# Supplementary material for: MWCNT–CTAB modified glassy carbon electrode as a sensor for the determination of paracetamol
Source: Royal Society of Chemistry journal article supplement (doi:10.1039/c5ra05802c), 2015-01-01

**Supplementary Fig. S1.** Schematic diagram of the proposed modification steps.

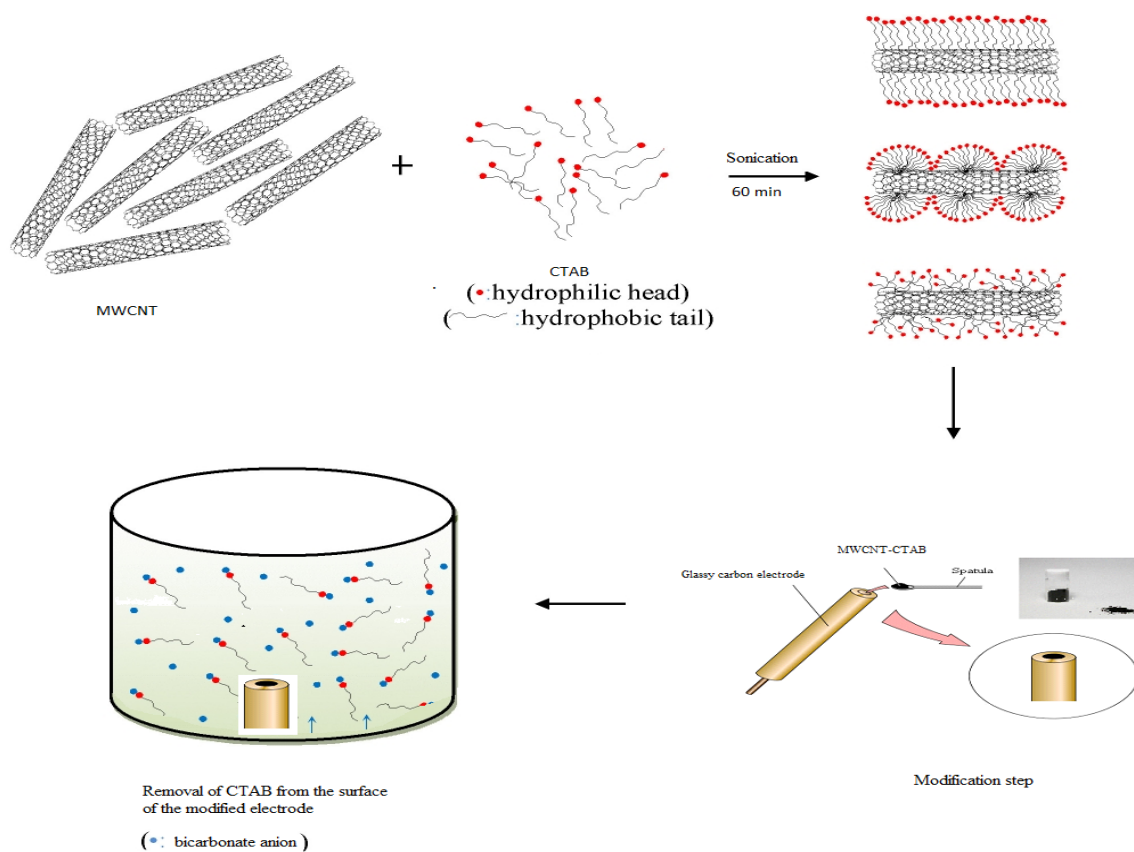

**Supplementary Fig. S2.** Effect of amount of MWCNT-CTAB suspension on response current of the sensor for 1.0 mM PCM.

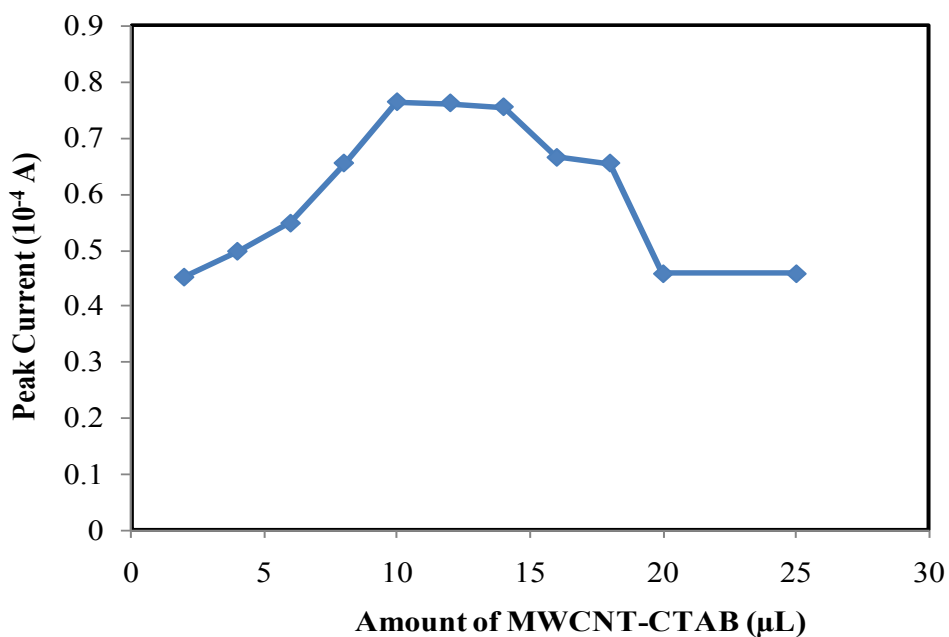

**Supplementary Fig. S3.** Relation between log peak current vs. log scan rate.

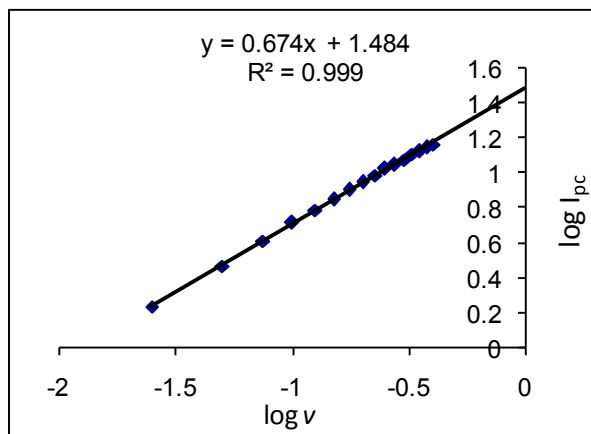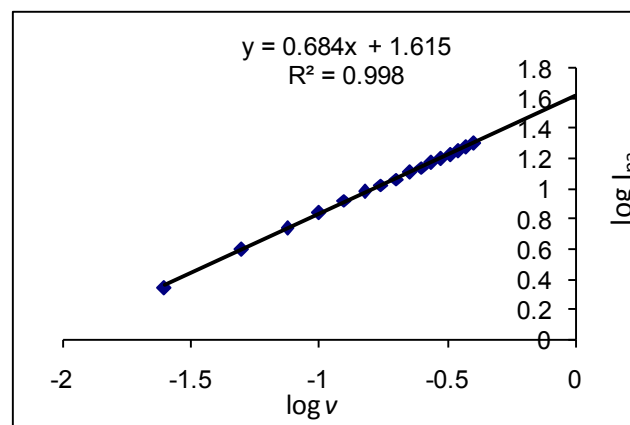

Supplement: c5ra05802c1.pdf [file c5ra05802c1.pdf]
